# Supplementary material
Source: ML conference proceedings conference paper supplement (https://openreview.net/forum?id=8IMz713Bxcq)
Supplement: supplementary_material [file attachment]

## A SUMMARY OF URLS TO BASELINES AND DATASETS

### SOURCE CODE OF BASELINES

**CPC:** <https://github.com/jefflai108/Contrastive-Predictive-Coding-PyTorch>  
**T-Loss:** <https://github.com/White-Link/UnsupervisedScalableRepresentationLearningTimeSeries>  
**TNC:** [https://github.com/sanatonek/TNC\\_representation\\_learning](https://github.com/sanatonek/TNC_representation_learning)  
**TST:** [https://github.com/gzerveas/mvts\\_transformer](https://github.com/gzerveas/mvts_transformer)  
**TS-TCC:** <https://github.com/emadeldeen24/TS-TCC>  
**TS2Vec:** <https://github.com/yuezhihan/ts2vec>

### BENCHMARK DATASETS

#### CLASSIFICATION DATASETS

**UCR:** <https://www.timeseriesclassification.com/dataset.php>  
**UEA:** <https://www.timeseriesclassification.com/dataset.php>

#### FORECASTING DATASETS

**Electricity:** <https://archive.ics.uci.edu/ml/datasets/ElectricityLoadDiagrams20112014>  
**Traffic:** <http://pems.dot.ca.gov>  
**Weather:** <https://www.bgc-jena.mpg.de/wetter/>

#### ANOMALY DETECTION DATASETS

**KPI:** <https://github.com/NetManAIOps/KPI-Anomaly-Detection>  
**Yahoo:** <https://webscope.sandbox.yahoo.com/catalog.php?datatype=s&did=70>
